# Supplementary material for: Boosting methanol productionviaplasma catalytic CO2hydrogenation over a MnOx/ZrO2catalyst
Source: Royal Society of Chemistry journal article supplement (doi:10.1039/d2cy02015g), 2023-01-01
Supplement: d2cy02015g1.pdf [file d2cy02015g1.pdf]

## Supporting information

### Boosting methanol production via plasma catalytic CO<sub>2</sub> hydrogenation over MnO<sub>x</sub>/ZrO<sub>2</sub>

#### catalyst

Xuming Zhang<sup>1</sup>, Zhi Sun<sup>1</sup>, Yun Shan<sup>1</sup>, Hua pan<sup>2</sup>, Yuzhen Jin<sup>1</sup>, Zuchao Zhu<sup>1</sup>, Liancheng Zhang<sup>1</sup>,

Kai Li<sup>1,\*</sup>

<sup>1</sup> Key Laboratory of Fluid Transmission Technology of Zhejiang Province, Zhejiang Sci-Tech University, Hangzhou 310018, China

<sup>2</sup> Zhejiang Provincial Key Laboratory of Pollution Exposure and Health Intervention, College of Biological and Environment Engineering, Zhejiang Shuren University, Hangzhou, 310015, China

\* E-mail address: likai6573@163.com (Kai Li)

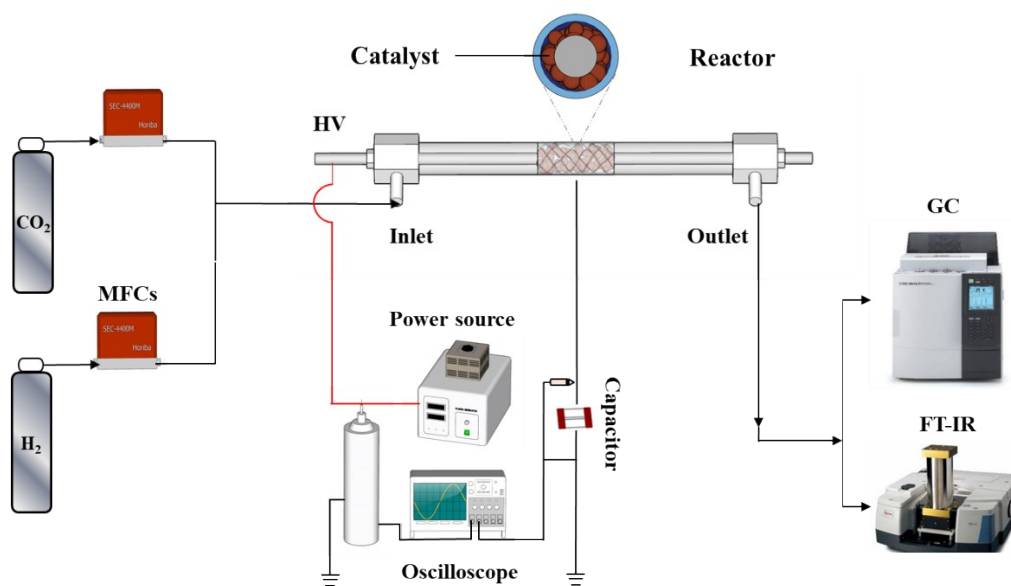

Fig. S1 Schematic diagram of the experimental setup

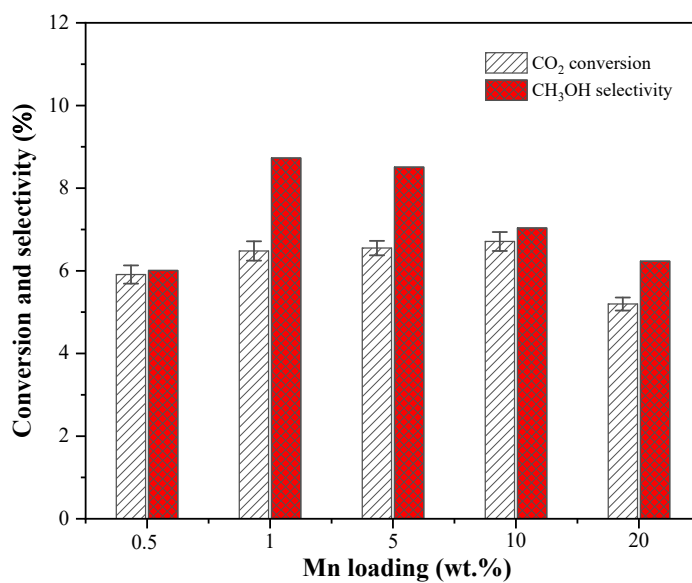

Fig. S2 The effect of Mn loading on the CO<sub>2</sub> conversion and CH<sub>3</sub>OH selectivity

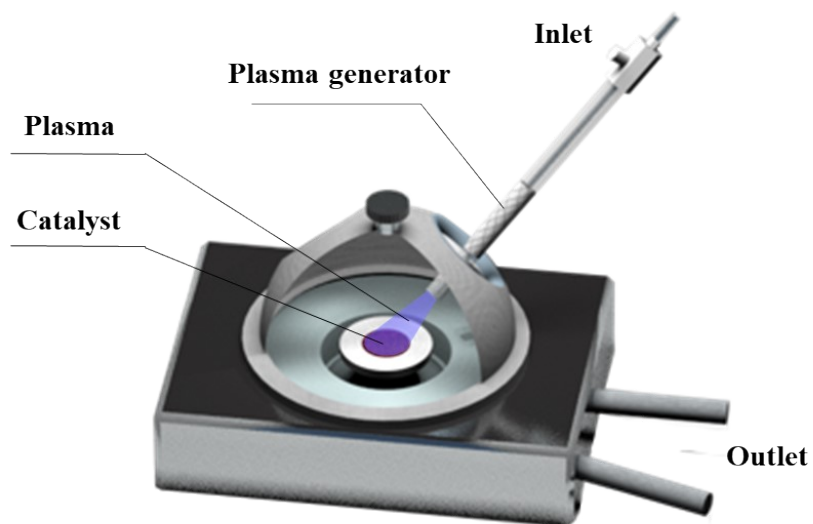

Fig. S3 Schematic diagram of the designed plasma-added DRIFT spectra cell

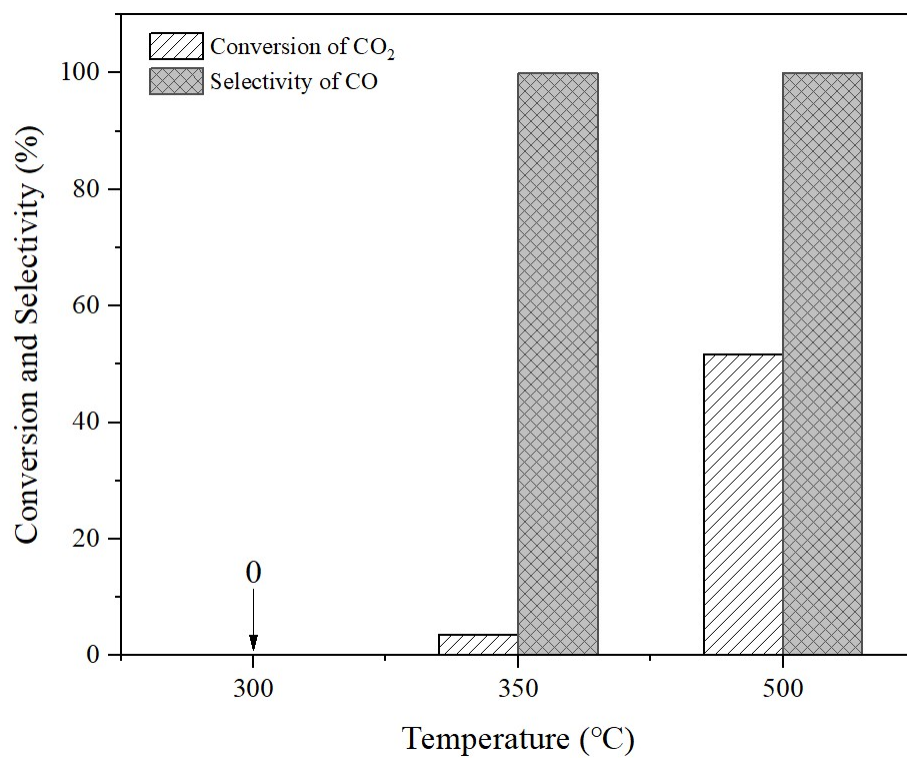

Fig. S4 The effect of temperature on CO<sub>2</sub> conversion and CO selectivity in thermal catalysis CO<sub>2</sub> hydrogenation reaction.

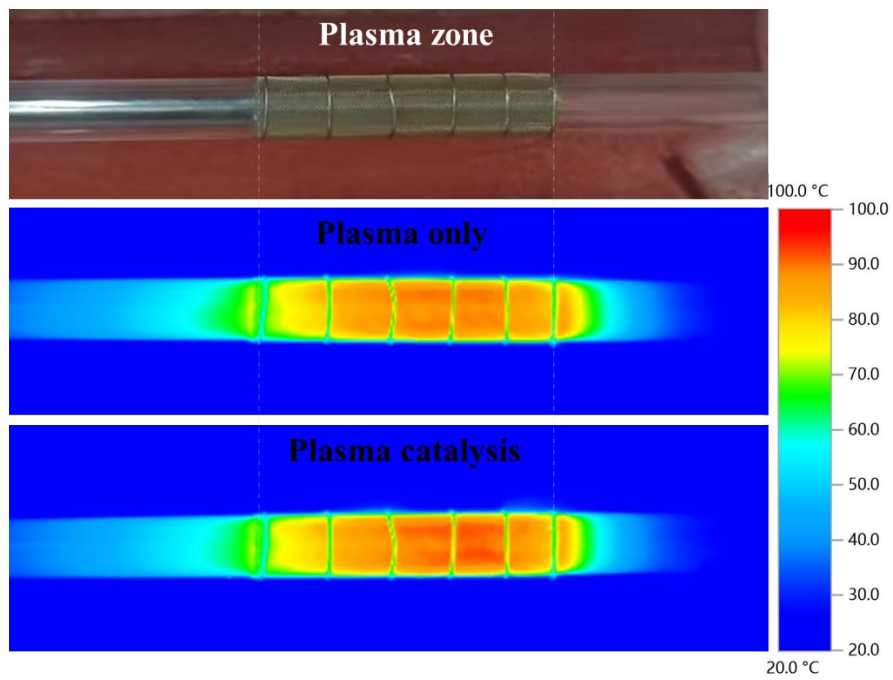

Fig. S5 The reactor temperature distribution of plasma only and plasma catalysis after 3-h discharge

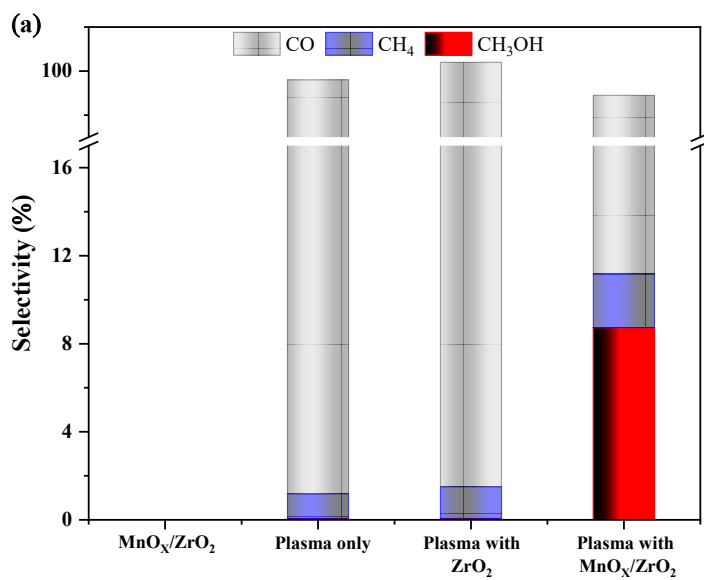

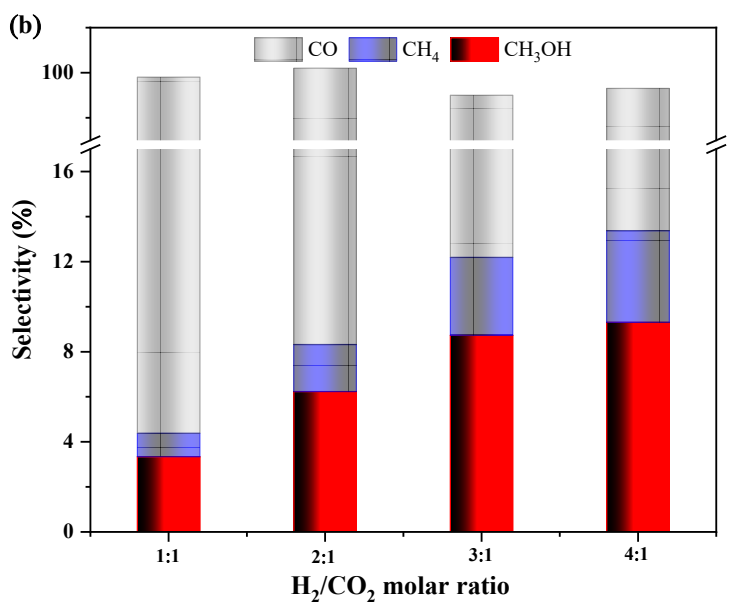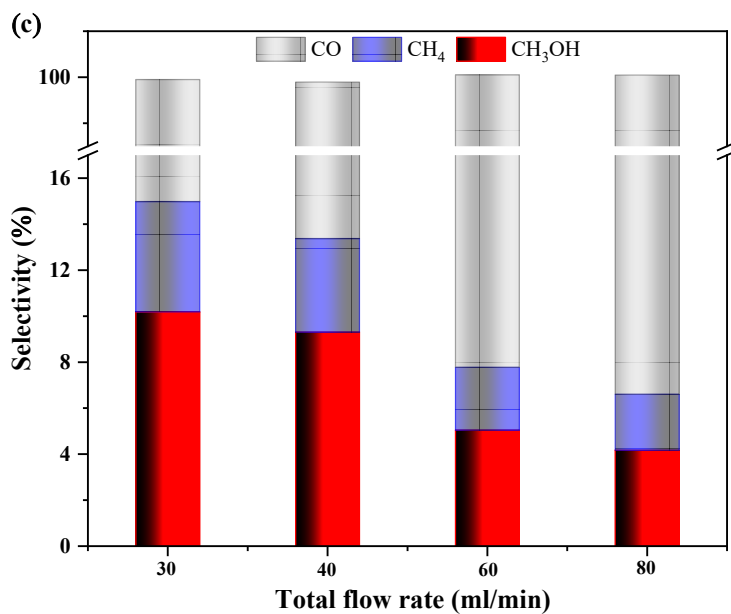

Fig. S6 (a) The products selectivities comparison of thermal catalysis, plasma only and plasma catalysis reaction routes for CO<sub>2</sub> hydrogenation to methanol; The effects of (b) H<sub>2</sub>/CO<sub>2</sub> molar ratio and (c) total flow rate on products selectivities

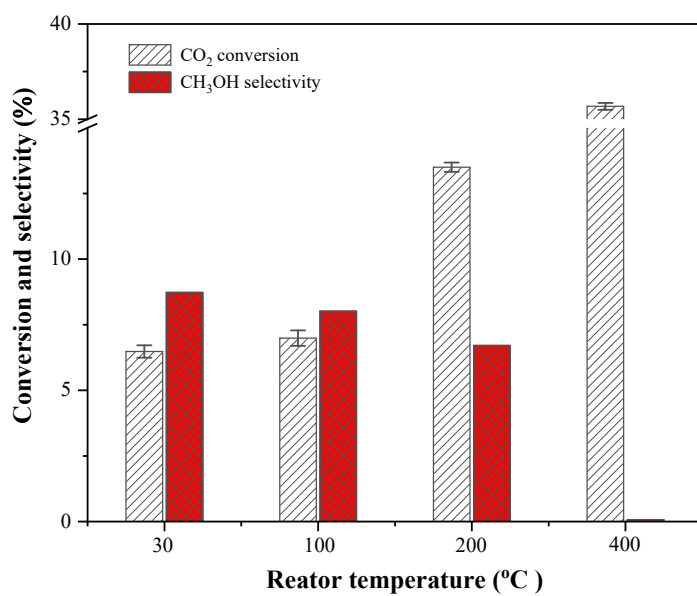

Fig. S7 The effect of reactor temperature on CO<sub>2</sub> conversion and methanol selectivity

Conditions: H<sub>2</sub>/CO<sub>2</sub> = 3, total flow rate of 40 mL/min, power of 5 W, 1wt.% MnO<sub>x</sub>/ZrO<sub>2</sub>.

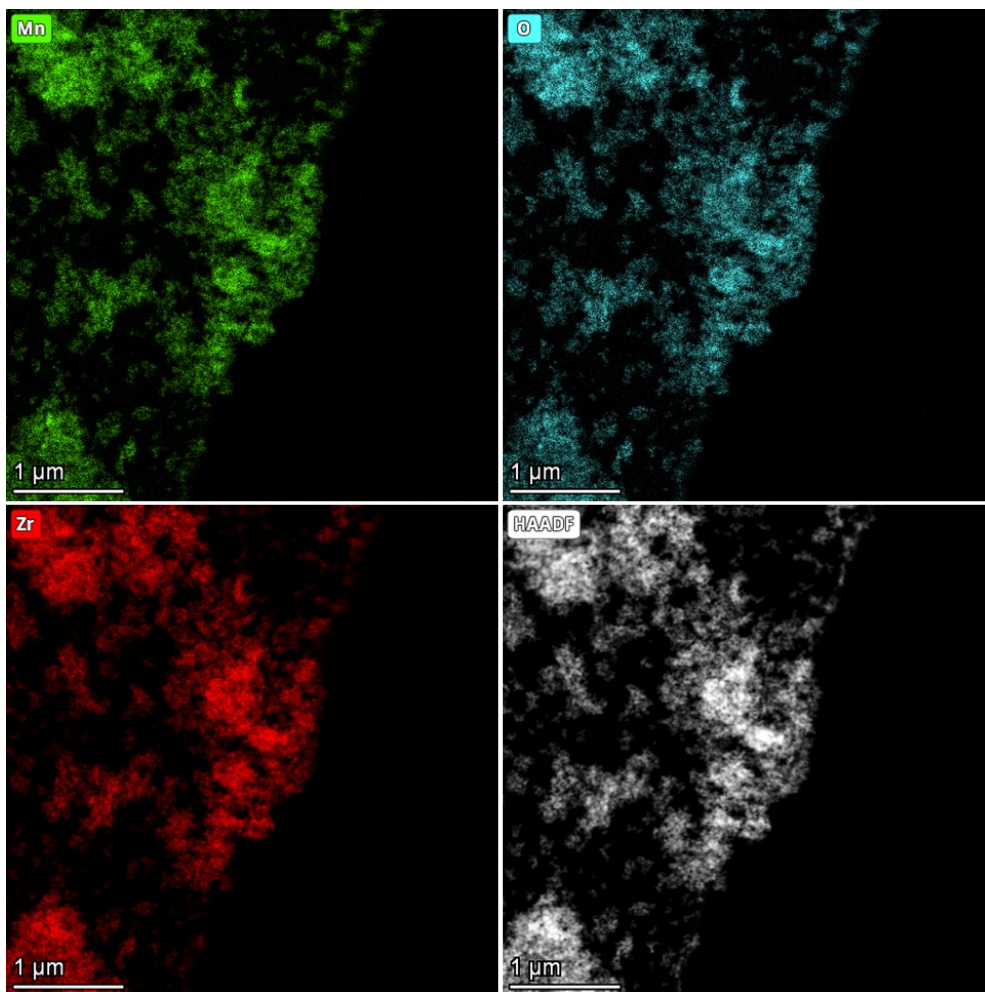

Fig. S8 The elemental mapping of  $\text{MnO}_x/\text{ZrO}_2$  catalyst.

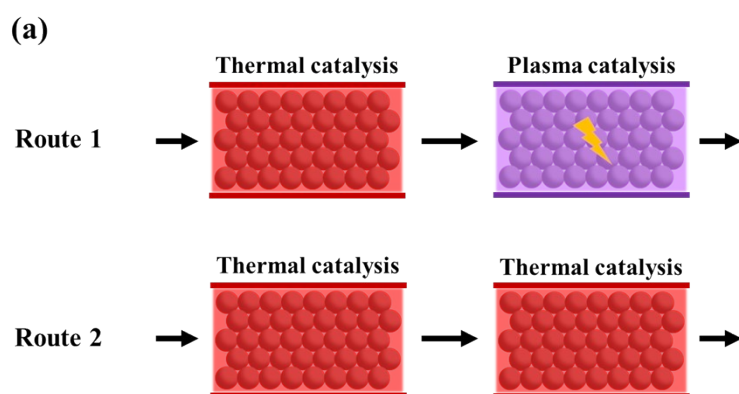

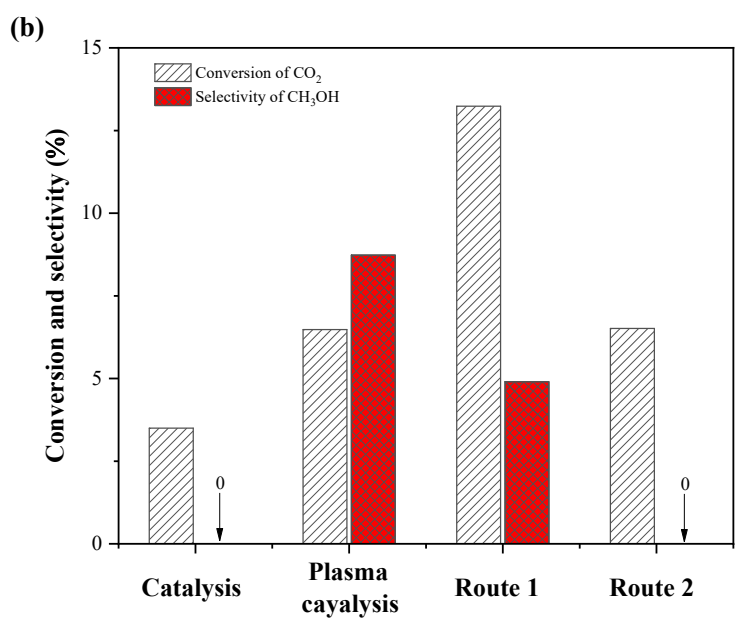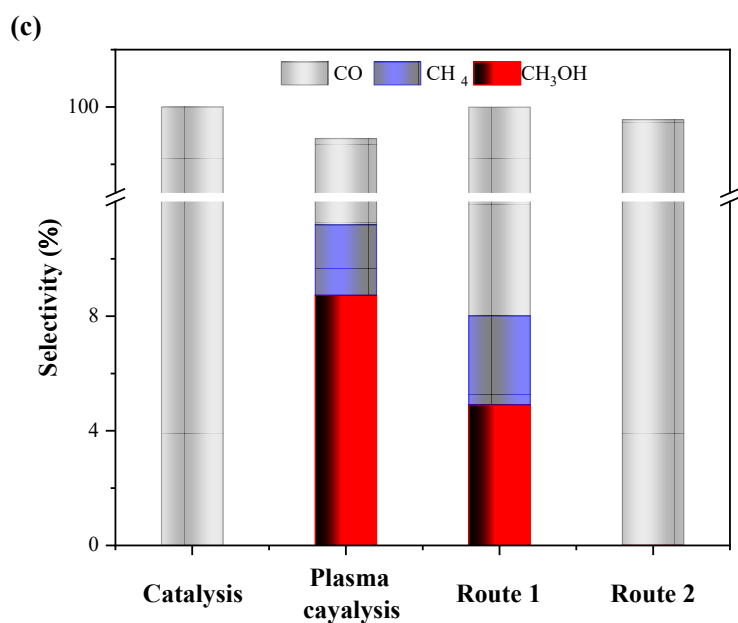

Fig. S9 (a) The schematic diagrams of Route 1 and 2; The comparison of thermal catalysis, plasma catalysis, Route 1 and Route 2: (b) CO<sub>2</sub> conversion and methanol selectivity, (c) products selectivities.

Two stages reactors were employed in Route 1 and 2. The first thermal catalysis reactor in both



routes worked as a CO provider since its only product was CO. This reactor was conducted at 350 °C, in which the CO<sub>2</sub> conversion was 4% and a feed gas with ~1% CO was achieved. This CO-contained feed gas was then introduced to the plasma catalysis and thermal catalysis in Route 1 and 2, respectively.

Table S1 XPS analyses of MnO<sub>x</sub>/ZrO<sub>2</sub> catalysts.

| Sample  | Mn <sup>2+</sup> content (%) | Mn <sup>3+</sup> content (%) | Mn <sup>4+</sup> content (%) | O <sub>s</sub> /(O <sub>l</sub> + O <sub>s</sub> ) (%) |
|---------|------------------------------|------------------------------|------------------------------|--------------------------------------------------------|
| Fresh   | 44.9                         | 16.4                         | 38.7                         | 21.7                                                   |
| Reduced | 50.1                         | 14.5                         | 35.4                         | 22.8                                                   |
| Used    | 53.2                         | 10.9                         | 35.9                         | 21.6                                                   |

Table S2 The synergy factor of plasma catalytic CO<sub>2</sub> hydrogenation to methanol in literatures

| Ref.      | Feed gas                        | Product            | Plasma | catalyst                               | Synergy factor |
|-----------|---------------------------------|--------------------|--------|----------------------------------------|----------------|
| This work | H <sub>2</sub> /CO <sub>2</sub> | CH <sub>3</sub> OH | DBD    | MnO <sub>x</sub> /ZrO <sub>2</sub>     | 87             |
| [1]       | H <sub>2</sub> /CO <sub>2</sub> | CH <sub>3</sub> OH | DBD    | Cu/γ-Al <sub>2</sub> O <sub>3</sub>    | 12.8           |
| [2]       | H <sub>2</sub> /CO <sub>2</sub> | CH <sub>3</sub> OH | DBD    | Pt/film/In <sub>2</sub> O <sub>3</sub> | 8.9            |
| [3]       | H <sub>2</sub> /CO <sub>2</sub> | CH <sub>3</sub> OH | DBD    | CuO/Fe <sub>2</sub> O <sub>3</sub> /QW | 1.0            |
| [4]       | H <sub>2</sub> /CO <sub>2</sub> | CH <sub>3</sub> OH | DBD    | Cu/γ-Al <sub>2</sub> O <sub>3</sub>    | 1.6            |
| [5]       | H <sub>2</sub> /CO <sub>2</sub> | CH <sub>3</sub> OH | DBD    | Co <sub>x</sub> O <sub>y</sub> /MgO    | 1.4            |

## Reference

- [1] Cui Z, Meng S, Yi Y, et al. Plasma-catalytic methanol synthesis from CO<sub>2</sub> hydrogenation over a supported Cu cluster catalyst: Insights into the reaction mechanism. *ACS Catalysis*, 2022, 12(2): 1326-1337.

- [2] Men Y L, Liu Y, Wang Q, et al. Highly dispersed Pt-based catalysts for selective CO<sub>2</sub> hydrogenation to methanol at atmospheric pressure. *Chemical Engineering Science*, 2019, 200: 167-175.
- [3] Joshi N, Loganathan S. Methanol synthesis from CO<sub>2</sub> using Ni and Cu supported Fe catalytic system: Understanding the role of nonthermal plasma surface discharge. *Plasma Processes and Polymers*, 2021, 18(5): 2000104.
- [4] Wang L, Yi Y, Guo H, et al. Atmospheric pressure and room temperature synthesis of methanol through plasma-catalytic hydrogenation of CO<sub>2</sub>. *ACS Catalysis*, 2018, 8(1): 90-100.
- [5] Ronda-Lloret M, Wang Y, Oulego P, et al. CO<sub>2</sub> hydrogenation at atmospheric pressure and low temperature using plasma-enhanced catalysis over supported cobalt oxide catalysts. *ACS Sustainable Chemistry & Engineering*, 2020, 8(47): 17397-17407.
